# Supplementary material for: Phenotypic Selection in Halenia elliptica D. Don (Gentianaceae), an Alpine Biennial with Mixed Mating System
Source: MDPI journal article supplement (doi:10.3390/plants11111488), 2022-05-31
Supplement: s1 [file s1]

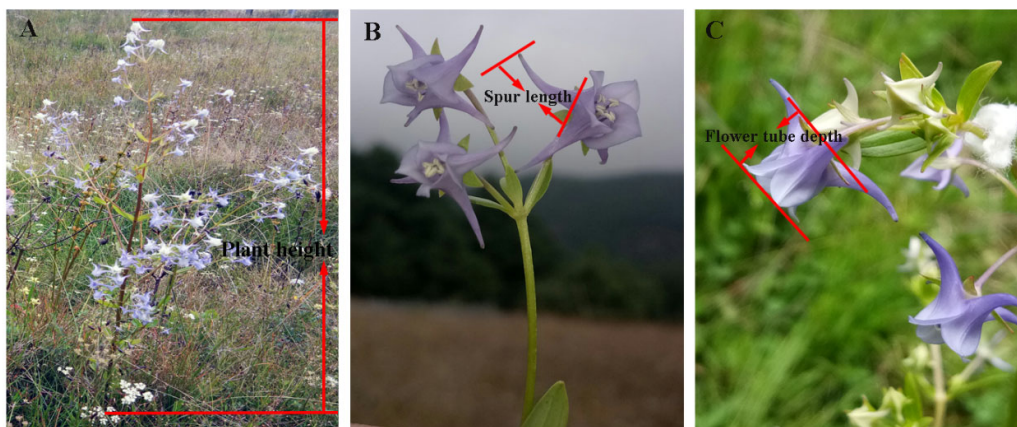

**Figure S1.** The morphological characteristics for *Halenia elliptica*. A) Plant height, B) spur length, C) flower tube depth.

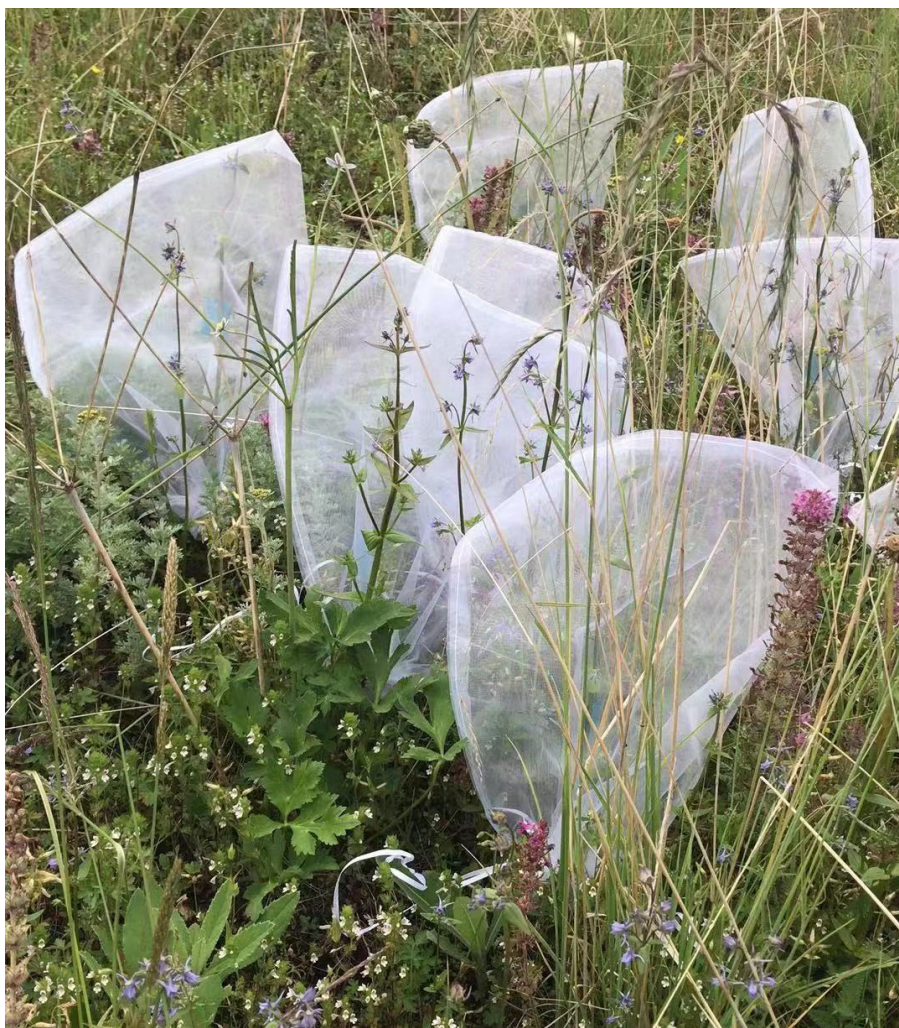

**Figure S2.** Wrapping the whole plant at the bud stage with mosquito net bags.
